# Supplementary material for: A Combined Experimental and Theoretical Study of Nitrofuran Antibiotics: Crystal Structures, DFT Computations, Sublimation and Solution Thermodynamics
Source: MDPI journal article supplement (doi:10.3390/molecules26113444), 2021-06-05
Supplement: s1 [file s1]

**Supplementary material**

for

**A combined experimental and theoretical study of  
nitrofurantoin antibiotics: crystal structures, DFT  
computations, sublimation and solution  
thermodynamics**

*Manin A.N.,<sup>1</sup> Drozd K.V.,<sup>1</sup> Voronin A.P.,<sup>1</sup> Churakov A.V.,<sup>2</sup> Perlovich G.L.<sup>1\*</sup>*

<sup>1</sup>G.A. Krestov Institute of Solution Chemistry of the Russian Academy of Sciences, 1

Akademicheskaya St., Ivanovo, 153045, Russian Federation

<sup>2</sup>Institute of General and Inorganic Chemistry, Russian Academy of Sciences, 31 Leninsky

Prosp., Moscow, 119991, Russian Federation

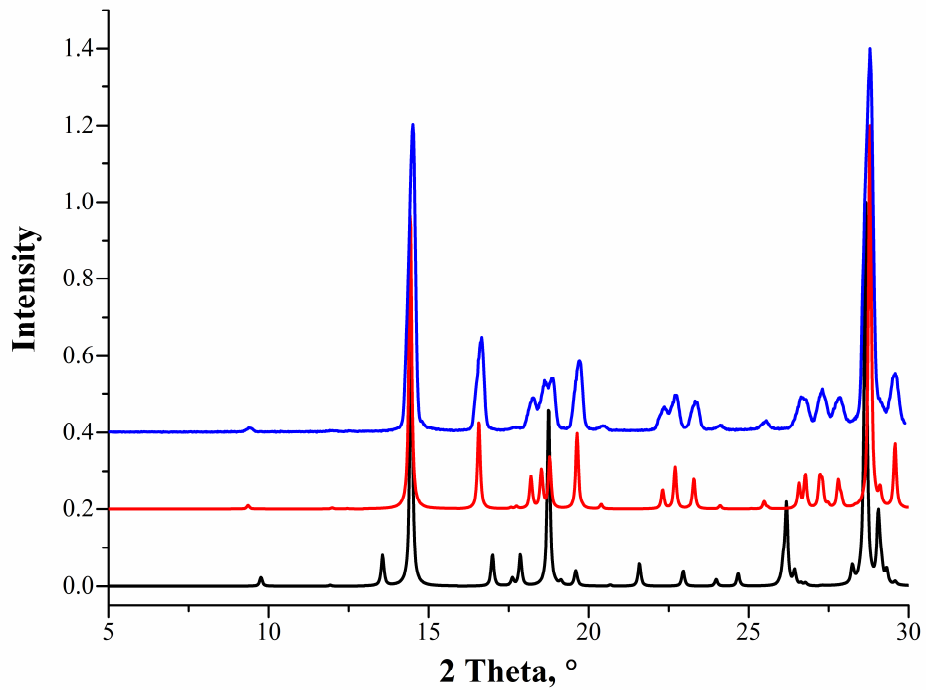

**Fig. S1.** An overlay of powder X-ray diffractograms of NFT: calculated based on the single-crystal data (triclinic  $\alpha$ -polymorph (black), monoclinic  $\beta$ -polymorph (red)) and experimental diffractogram (blue).

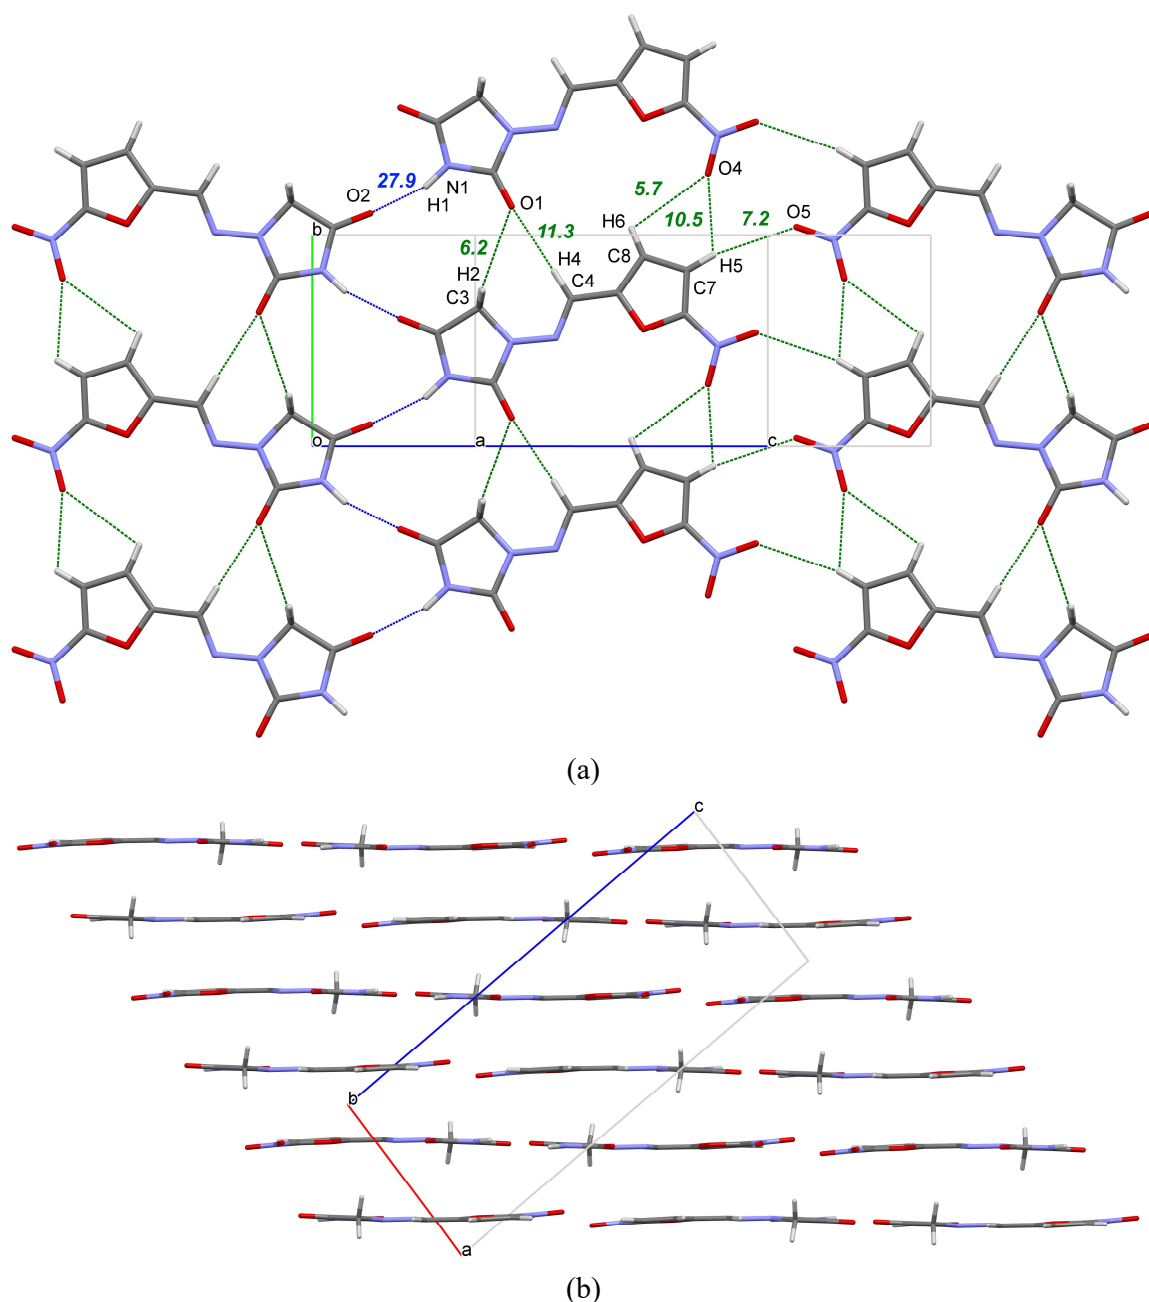

**Fig. S2.** Crystal structure of NFT ( $\beta$ -polymorph): (a) a 2D layer of NFT molecules formed by N-H $\cdots$ O (blue dots) and C-H $\cdots$ O bonds (green dots); (b) packing of 2D layers in the crystal. The numbers indicate the energy of H-bonds estimated using eq. (6) in  $\text{kJ}\cdot\text{mol}^{-1}$ .

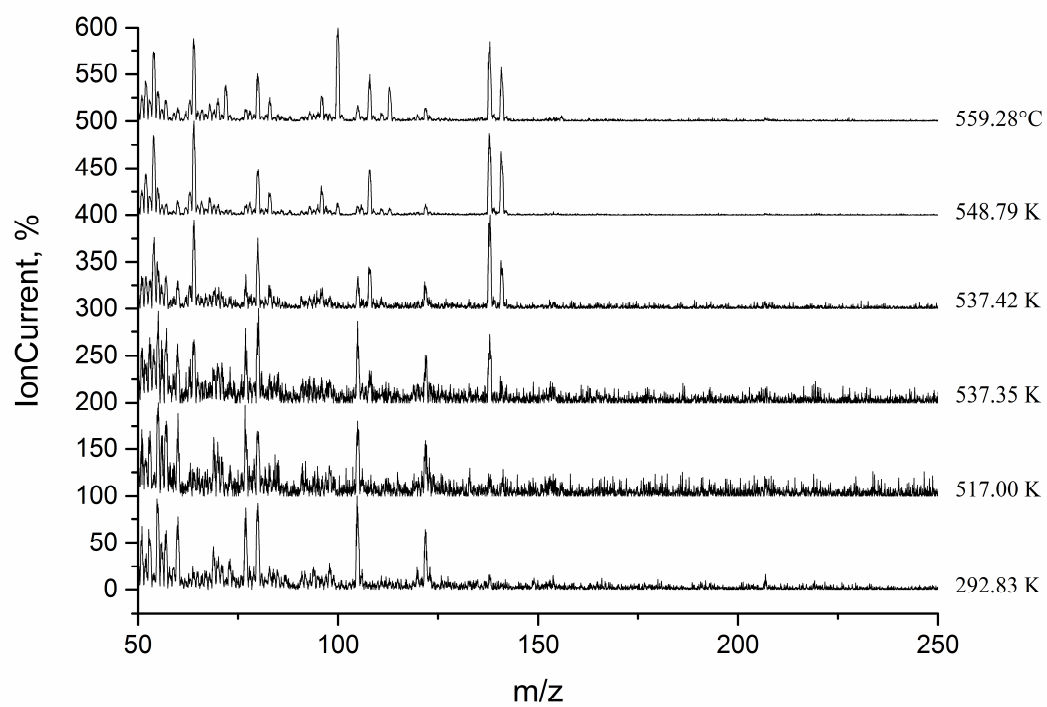

(a)

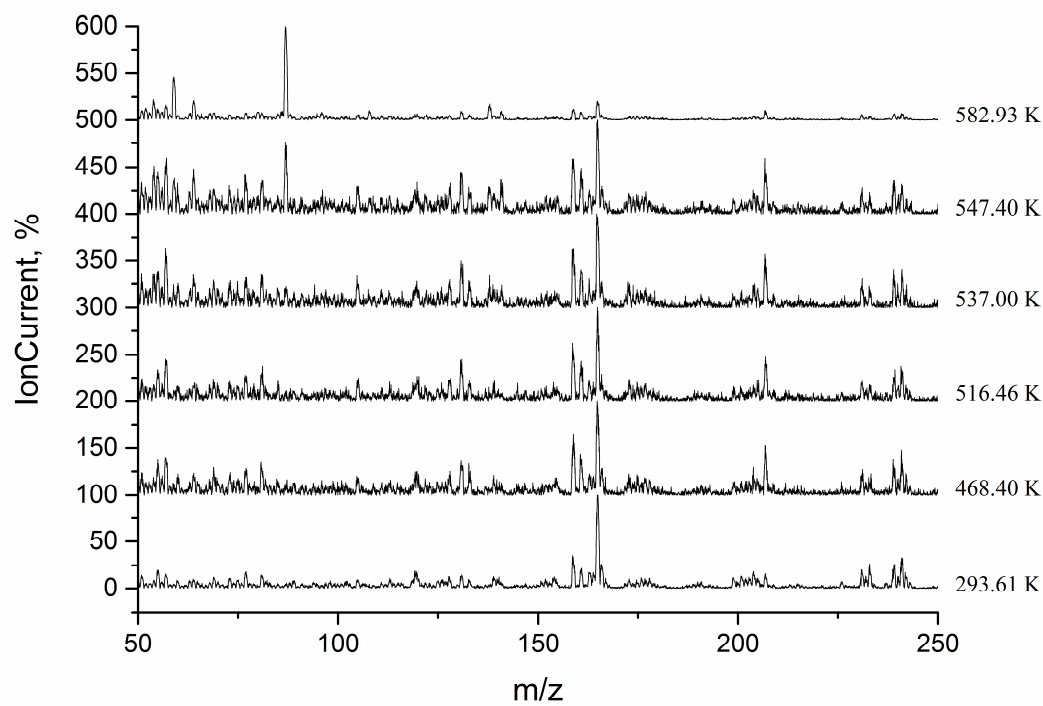

(b)

**Fig. S3.** Mass-spectra of (a)NFT and (b) FZL.

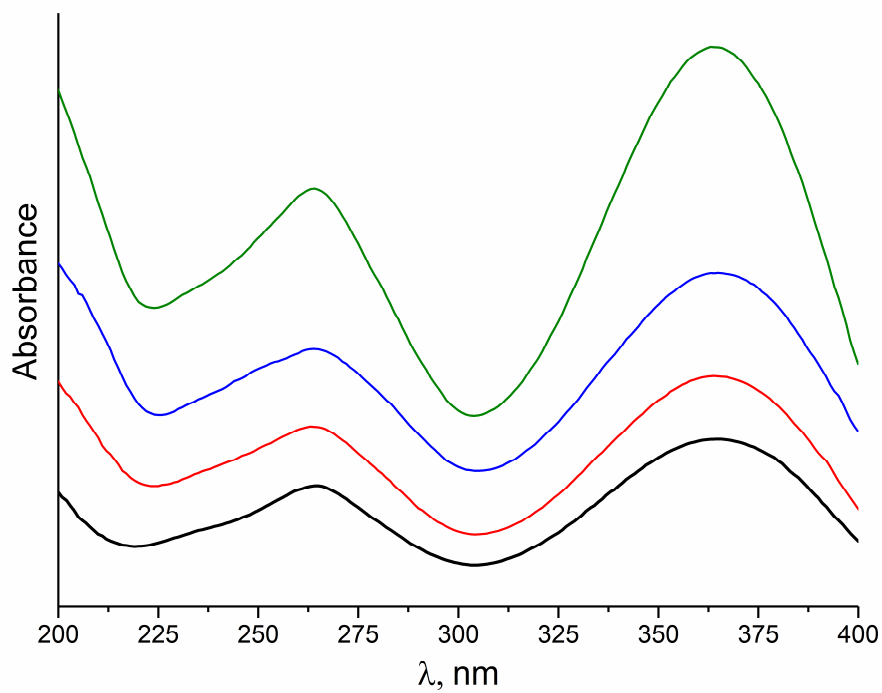

(a)

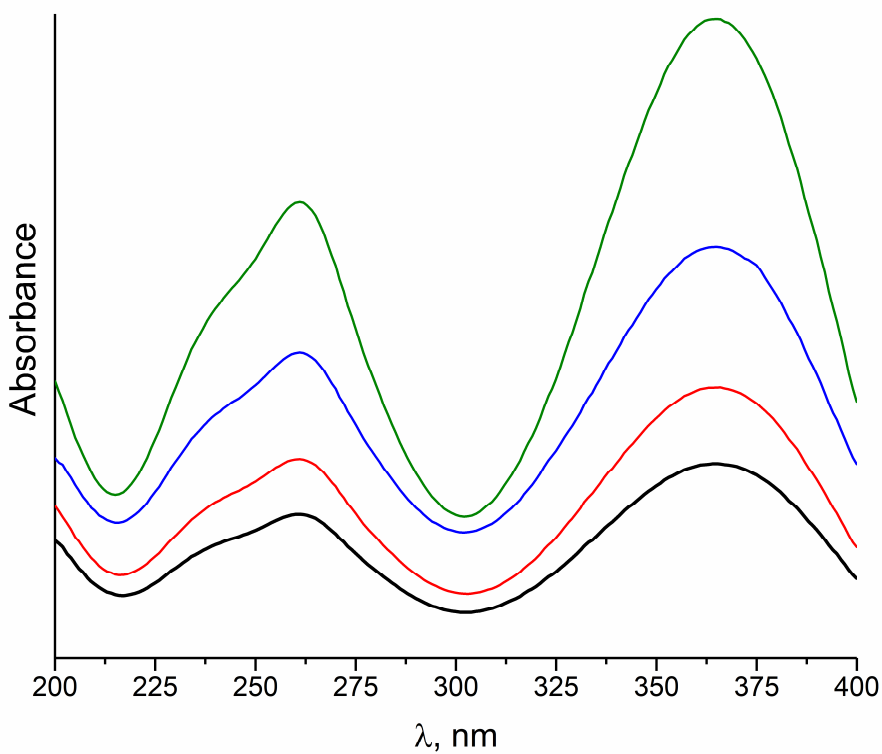

(b)

**Fig. S4.** UV absorption spectra before (black) and after the sublimation experiments of (a) NFT (red – at 438.6 K, blue – at 453.7 K, green – at 466.3 K) and (b) FZL (red – at 426.6 K, blue – at 437.9 K, green – at 443.4 K).

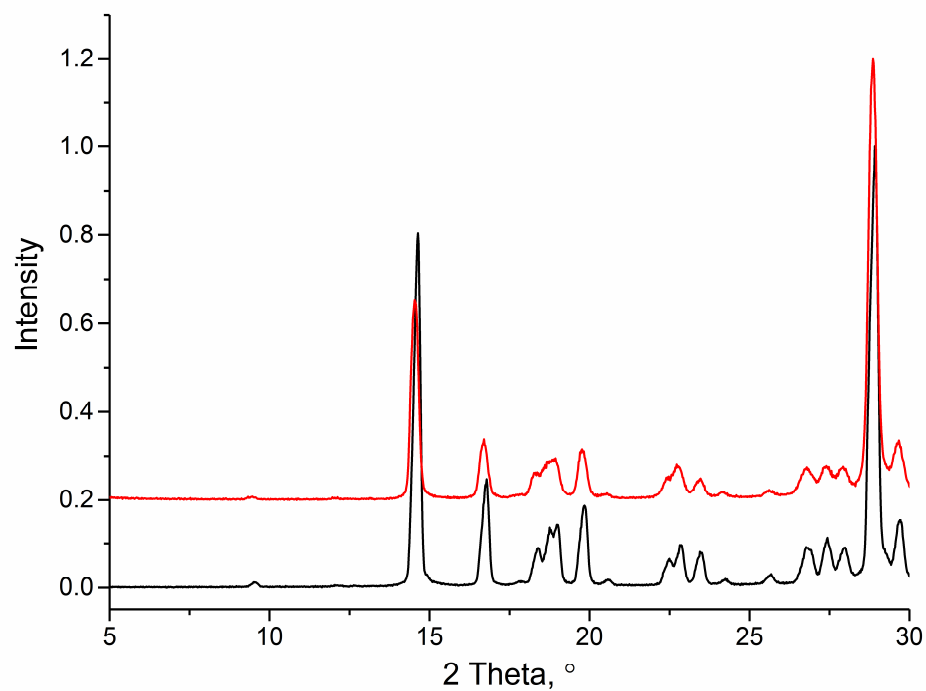

(a)

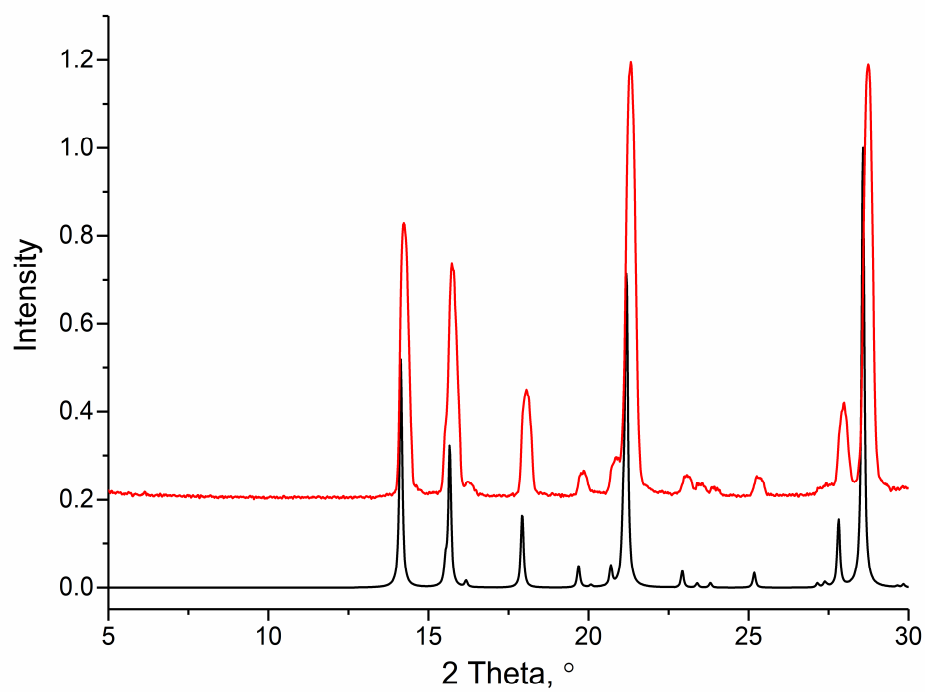

(b)

**Fig. S5.** An overlay of powder X-ray diffractograms of (a) NFT and (b) FZL before (black) and after (red) the sublimation experiments.

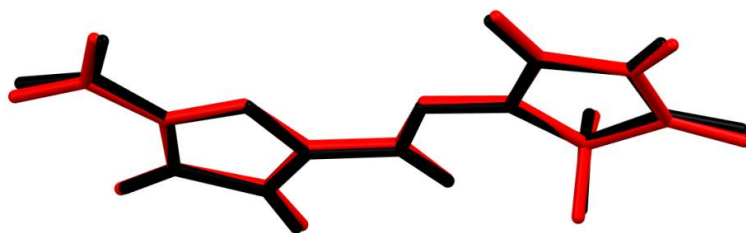

(a)

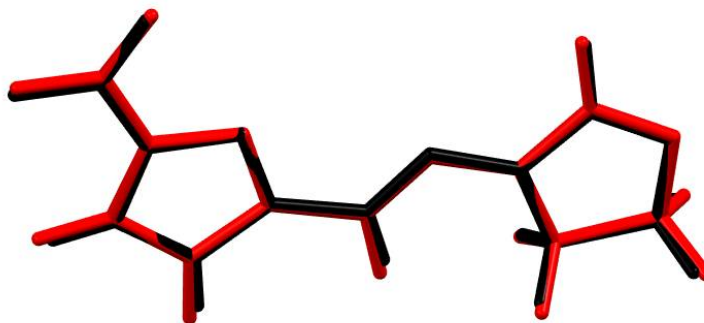

(b)

**Fig. S6.** An overlay of the single crystal (black) and optimized (red) structures of (a) NFT and (b) FZL.

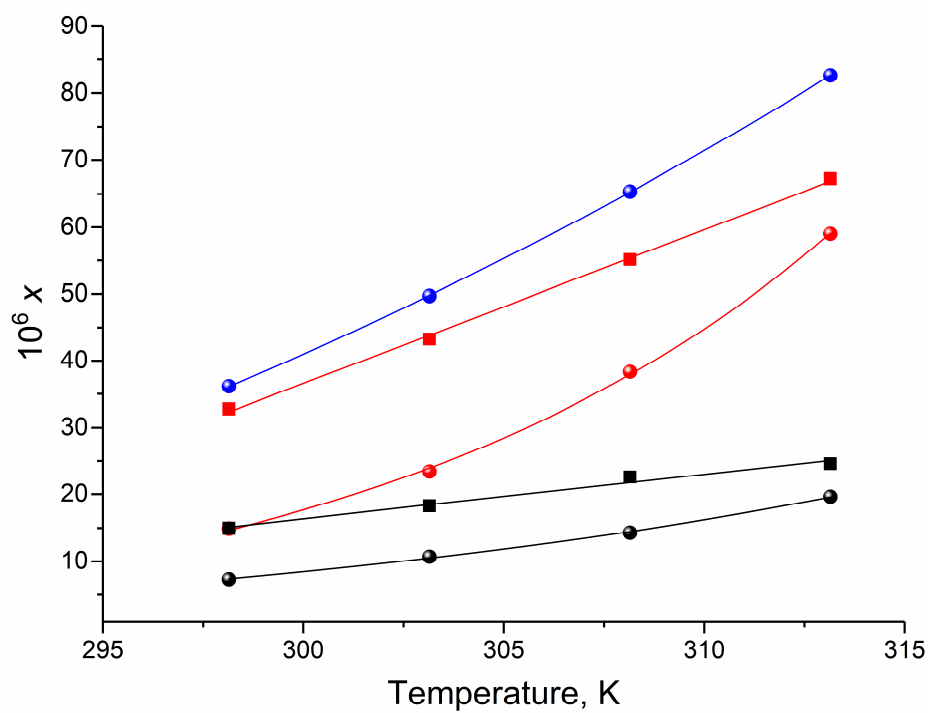

(a)

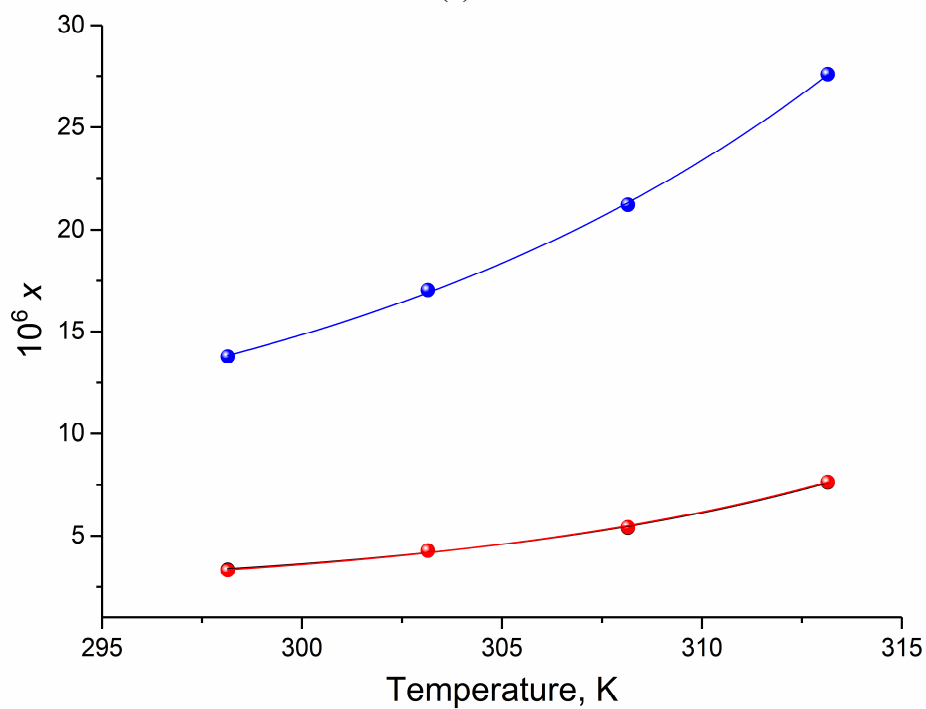

(b)

**Fig. S7.** Mole fraction solubility ( $X_2$ ) of (a) NFT (●- in buffer pH 2.0 (NFT monohydrate), ■- in buffer pH 2.0 (NFT anhydrate), ●- in buffer pH 7.4 (NFT monohydrate), ■- in buffer pH 7.4 (NFT anhydrate), ●- in 1-octanol) and (b) FLZ (●- in buffer pH 2.0, ●- in buffer pH 7.4, ●- in 1-octanol) at different temperatures.



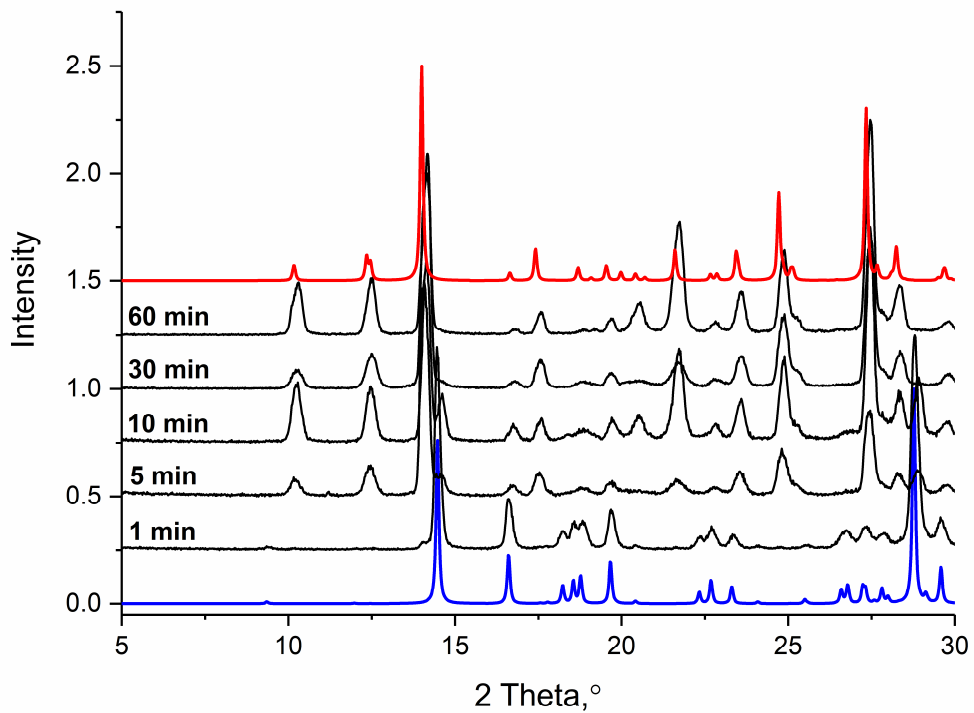

**Fig. S8.** PXRD analysis of the residual materials after solubility experiment of NFT in buffer pH 7.4 at 298.15 K from 1 to 60 minutes of experiment (PXRD of NFT β-polymorph (blue), NFT monohydrate *Pbca* form calculated based on the single-crystal data(red)).

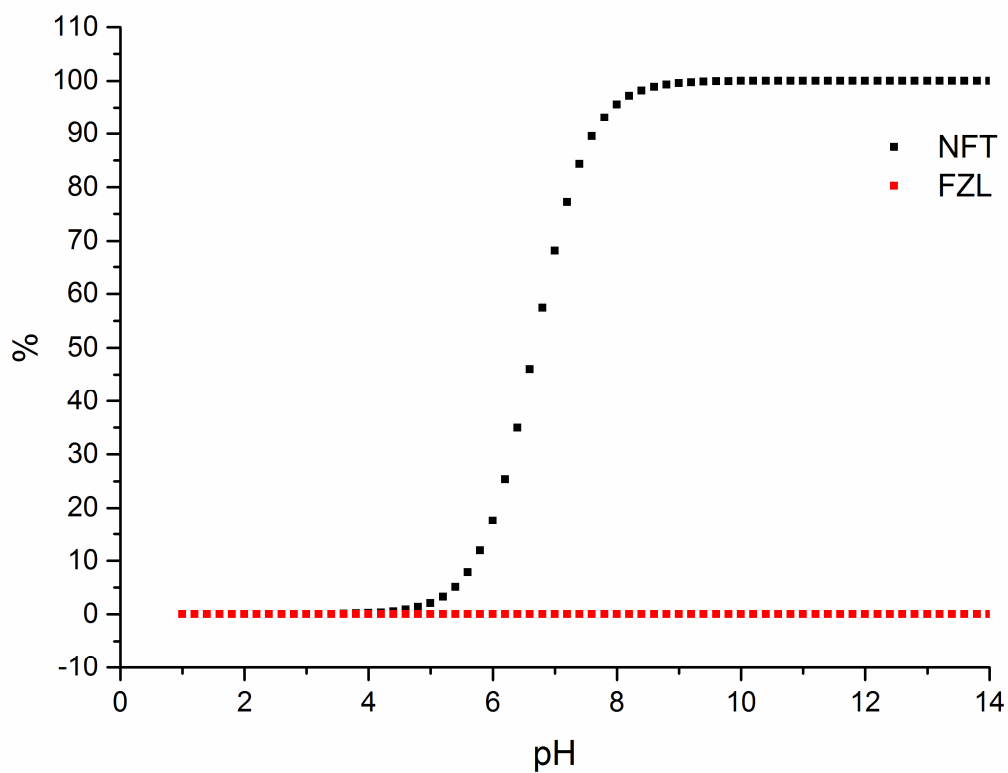

**Fig. S9.** Distribution diagram of the different species of NFT and FZL as a function of pH at 298.15 K ( $pK_a(\text{NFT})$  6.67 [1];  $pK_a(\text{FZL})$  -2.4 (calc. in ChemAxon))

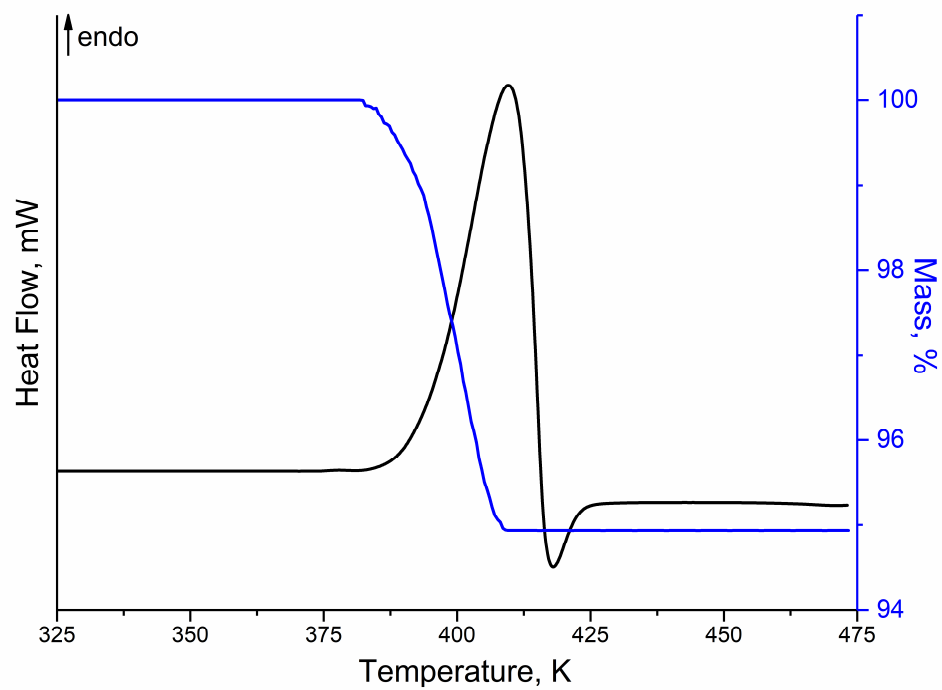

**Fig. S10.** DCS/TG curves of NFT monohydrate obtained after solubility experiment in buffer pH 7.4 at 298.15 K.

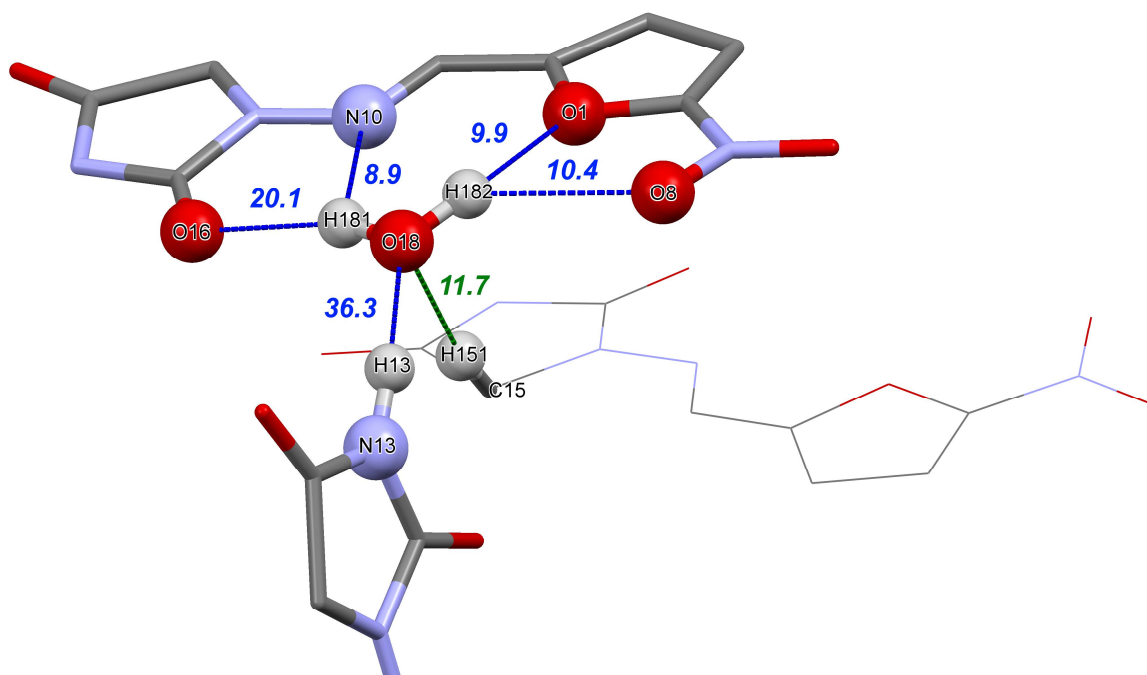

**Fig. S11.** Conventional (blue dotted lines) and non-conventional (green dotted line) hydrogen bonds formed by water molecules in the [NFT+H<sub>2</sub>O] (1:1) crystal. The numbers denote the interaction energies estimated from QTAIMC analysis using Eq. (6). For clarity, only a part of the bottom NFT molecule is shown and the molecule in the back is displayed in a wireframe style.

**Table S1.** Density of the investigated solvents at different temperatures and constant pressure ( $p = 0.1$  MPa)<sup>a</sup>

| Solvent                    | $\rho/\text{g}\cdot\text{cm}^{-3}$ |          |          |          |          |
|----------------------------|------------------------------------|----------|----------|----------|----------|
|                            | 293.15 K                           | 298.15 K | 303.15 K | 308.15 K | 313.15 K |
| Buffer pH 2.0 <sup>b</sup> | 1.0035                             | 1.0023   | 1.0008   | 0.9992   | 0.9973   |
| Buffer pH 7.4 <sup>c</sup> | 1.0060                             | 1.0048   | 1.0033   | 1.0016   | 0.9998   |
| 1-Octanol                  | 0.8251                             | 0.8217   | 0.8183   | 0.8148   | 0.8114   |

<sup>a</sup>Density data for all solvents were taken from Ref. [2]

<sup>b</sup>Composition of aqueous buffer pH 2.0: KCl (6.57 g in 1 L) and 0.1 mol·L<sup>-1</sup> hydrochloric acid (119.0 mL in 1 L);

<sup>c</sup>Composition of aqueous buffer pH 7.4: KH<sub>2</sub>PO<sub>4</sub> (9.1 g in 1 L) and Na<sub>2</sub>HPO<sub>4</sub>·12H<sub>2</sub>O (23.6 g in 1 L).

Standard uncertainties for mass salt ( $m$ ) and volume of solution ( $V$ ):  $u(m) = 5$  mg,  $u(V) = 0.5$  mL.

Standard uncertainties:  $u(T) = 0.15$  K,  $u(p) = 3$  kPa and  $u(\rho) = 0.002$  g·cm<sup>-3</sup>.

**Table S2.** Transpiration experiment parameters, vapor pressure of the investigated compounds at different temperatures

| T, K                                                                                                                     | m, mg                | V(N <sub>2</sub> ), dm <sup>3</sup> | T <sub>a</sub> , K | Flow,<br>dm <sup>3</sup> ·h <sup>-1</sup> | p, Pa                | ln(p) |
|--------------------------------------------------------------------------------------------------------------------------|----------------------|-------------------------------------|--------------------|-------------------------------------------|----------------------|-------|
| <b><i>Nitrofurantoin (crystal)</i></b>                                                                                   |                      |                                     |                    |                                           |                      |       |
| $\ln(p) = (33.6 \pm 0.2) - (16832 \pm 80) / T$ ; $\sigma = 1.07 \cdot 10^{-2}$ ; $r = 0.99946$ ; $F = 44109$ ; $n = 25$  |                      |                                     |                    |                                           |                      |       |
| 430.6                                                                                                                    | $3.22 \cdot 10^{-3}$ | 7.86                                | 297.5              | 1.62                                      | $4.25 \cdot 10^{-3}$ | -5.46 |
| 432.4                                                                                                                    | $3.86 \cdot 10^{-3}$ | 7.86                                | 297.7              | 1.62                                      | $5.10 \cdot 10^{-3}$ | -5.28 |
| 434.5                                                                                                                    | $4.80 \cdot 10^{-3}$ | 8.18                                | 297.8              | 1.62                                      | $6.10 \cdot 10^{-3}$ | -5.10 |
| 436.3                                                                                                                    | $5.17 \cdot 10^{-3}$ | 7.89                                | 297.5              | 1.62                                      | $6.80 \cdot 10^{-3}$ | -4.99 |
| 438.6                                                                                                                    | $6.63 \cdot 10^{-3}$ | 8.18                                | 297.7              | 1.62                                      | $8.42 \cdot 10^{-3}$ | -4.78 |
| 440.6                                                                                                                    | $7.24 \cdot 10^{-3}$ | 7.32                                | 297.5              | 1.62                                      | $1.03 \cdot 10^{-2}$ | -4.58 |
| 442.6                                                                                                                    | $8.07 \cdot 10^{-3}$ | 6.82                                | 297.7              | 1.62                                      | $1.23 \cdot 10^{-2}$ | -4.40 |
| 444.3                                                                                                                    | $7.68 \cdot 10^{-3}$ | 5.78                                | 297.6              | 1.62                                      | $1.38 \cdot 10^{-2}$ | -4.28 |
| 445.5                                                                                                                    | $1.57 \cdot 10^{-2}$ | 10.83                               | 293.5              | 1.62                                      | $1.48 \cdot 10^{-2}$ | -4.21 |
| 446.8                                                                                                                    | $1.60 \cdot 10^{-2}$ | 9.78                                | 293.5              | 1.62                                      | $1.68 \cdot 10^{-2}$ | -4.09 |
| 448.9                                                                                                                    | $1.90 \cdot 10^{-2}$ | 9.50                                | 292.6              | 1.62                                      | $2.04 \cdot 10^{-2}$ | -3.89 |
| 451.1                                                                                                                    | $1.93 \cdot 10^{-2}$ | 7.83                                | 298.0              | 1.62                                      | $2.56 \cdot 10^{-2}$ | -3.66 |
| 451.9                                                                                                                    | $2.27 \cdot 10^{-2}$ | 8.78                                | 292.1              | 1.62                                      | $2.64 \cdot 10^{-2}$ | -3.63 |
| 453.7                                                                                                                    | $2.61 \cdot 10^{-2}$ | 8.75                                | 293.7              | 1.62                                      | $3.06 \cdot 10^{-2}$ | -3.49 |
| 454.2                                                                                                                    | $2.45 \cdot 10^{-2}$ | 7.83                                | 297.2              | 1.62                                      | $3.24 \cdot 10^{-2}$ | -3.43 |
| 455.4                                                                                                                    | $1.89 \cdot 10^{-2}$ | 5.48                                | 295.9              | 1.62                                      | $3.57 \cdot 10^{-2}$ | -3.33 |
| 456.9                                                                                                                    | $2.40 \cdot 10^{-2}$ | 6.24                                | 297.6              | 1.62                                      | $4.00 \cdot 10^{-2}$ | -3.22 |
| 457.6                                                                                                                    | $3.51 \cdot 10^{-2}$ | 8.59                                | 295.3              | 1.62                                      | $4.22 \cdot 10^{-2}$ | -3.17 |
| 458.7                                                                                                                    | $3.75 \cdot 10^{-2}$ | 8.02                                | 295.2              | 1.62                                      | $4.81 \cdot 10^{-2}$ | -3.03 |
| 460.7                                                                                                                    | $4.05 \cdot 10^{-2}$ | 7.51                                | 293.0              | 1.62                                      | $5.51 \cdot 10^{-2}$ | -2.90 |
| 462.1                                                                                                                    | $3.71 \cdot 10^{-2}$ | 6.29                                | 293.2              | 1.62                                      | $6.03 \cdot 10^{-2}$ | -2.81 |
| 463.7                                                                                                                    | $2.50 \cdot 10^{-2}$ | 3.75                                | 292.9              | 1.62                                      | $6.82 \cdot 10^{-2}$ | -2.68 |
| 465.4                                                                                                                    | $3.40 \cdot 10^{-2}$ | 4.56                                | 293.7              | 1.62                                      | $7.63 \cdot 10^{-2}$ | -2.57 |
| 466.3                                                                                                                    | $3.83 \cdot 10^{-2}$ | 4.67                                | 293.0              | 1.62                                      | $8.39 \cdot 10^{-2}$ | -2.48 |
| 467.4                                                                                                                    | $3.89 \cdot 10^{-2}$ | 4.35                                | 294.4              | 1.62                                      | $9.20 \cdot 10^{-2}$ | -2.39 |
| <b><i>Furazolidone (crystal)</i></b>                                                                                     |                      |                                     |                    |                                           |                      |       |
| $\ln(p) = (30.9 \pm 0.3) - (14671 \pm 127) / T$ ; $\sigma = 3.90 \cdot 10^{-3}$ ; $r = 0.99951$ ; $F = 13329$ ; $n = 15$ |                      |                                     |                    |                                           |                      |       |
| 423.1                                                                                                                    | $1.71 \cdot 10^{-2}$ | 8.07                                | 297.8              | 1.62                                      | $2.33 \cdot 10^{-2}$ | -3.76 |
| 424.6                                                                                                                    | $1.90 \cdot 10^{-2}$ | 7.71                                | 297.5              | 1.62                                      | $2.70 \cdot 10^{-2}$ | -3.61 |
| 426.6                                                                                                                    | $2.11 \cdot 10^{-2}$ | 7.24                                | 298.3              | 1.62                                      | $3.21 \cdot 10^{-2}$ | -3.44 |
| 428.6                                                                                                                    | $2.51 \cdot 10^{-2}$ | 7.40                                | 298.3              | 1.62                                      | $3.73 \cdot 10^{-2}$ | -3.29 |
| 429.9                                                                                                                    | $1.44 \cdot 10^{-2}$ | 3.73                                | 298.2              | 1.62                                      | $4.25 \cdot 10^{-2}$ | -3.16 |
| 431.3                                                                                                                    | $1.41 \cdot 10^{-2}$ | 3.32                                | 299.0              | 1.62                                      | $4.69 \cdot 10^{-2}$ | -3.06 |
| 433.0                                                                                                                    | $1.78 \cdot 10^{-2}$ | 3.77                                | 297.3              | 1.62                                      | $5.17 \cdot 10^{-2}$ | -2.96 |
| 435.1                                                                                                                    | $1.95 \cdot 10^{-2}$ | 3.35                                | 297.4              | 1.62                                      | $6.39 \cdot 10^{-2}$ | -2.75 |
| 436.1                                                                                                                    | $2.35 \cdot 10^{-2}$ | 3.77                                | 297.5              | 1.62                                      | $6.85 \cdot 10^{-2}$ | -2.68 |
| 437.9                                                                                                                    | $2.37 \cdot 10^{-2}$ | 3.43                                | 297.8              | 1.62                                      | $7.57 \cdot 10^{-2}$ | -2.58 |
| 439.1                                                                                                                    | $2.63 \cdot 10^{-2}$ | 3.48                                | 297.8              | 1.62                                      | $8.29 \cdot 10^{-2}$ | -2.49 |
| 440.7                                                                                                                    | $2.90 \cdot 10^{-2}$ | 3.32                                | 298.0              | 1.62                                      | $9.59 \cdot 10^{-2}$ | -2.34 |
| 442.1                                                                                                                    | $3.39 \cdot 10^{-2}$ | 3.52                                | 297.6              | 1.62                                      | $1.06 \cdot 10^{-1}$ | -2.25 |
| 443.4                                                                                                                    | $3.06 \cdot 10^{-2}$ | 2.88                                | 298.1              | 1.62                                      | $1.17 \cdot 10^{-1}$ | -2.15 |
| 444.0                                                                                                                    | $3.77 \cdot 10^{-2}$ | 3.40                                | 297.6              | 1.62                                      | $1.22 \cdot 10^{-1}$ | -2.11 |

Standard uncertainty for temperature  $u(T) = 0.15$  K

Relative standard uncertainty for pressure  $u_r(p) = 0.05$

**Table S3.** Comparison of calculated (B3LYP-D3(BJ,ABC)/6-31G(d,p) level of theory) and experimental thermodynamic properties of sublimation processes of NFT and FZL

| Compound                                                                 | NFT          |                          | FZL          |                          |
|--------------------------------------------------------------------------|--------------|--------------------------|--------------|--------------------------|
|                                                                          | <i>Calc.</i> | <i>Exp.</i> <sup>a</sup> | <i>Calc.</i> | <i>Exp.</i> <sup>a</sup> |
| <sup>b</sup> $E_{latt}$ (0 K), kJ·mol <sup>-1</sup>                      | 139.6        |                          | 121.9        |                          |
| $C_p^{cr}$ (298.15K), J·mol <sup>-1</sup> ·K <sup>-1</sup>               | 236.5        | 287.8 <sup>c</sup>       | 223.7        | 286.4 <sup>c</sup>       |
| $C_p^g$ (298.15K), J·mol <sup>-1</sup> ·K <sup>-1</sup>                  | 223.3        | 243.9 <sup>d</sup>       | 202.0        | 242.7 <sup>d</sup>       |
| $\int_0^{298.15} (C_p^g - C_p^{cr}) dT$ , kJ·mol <sup>-1</sup>           | -1.4         |                          | -3.0         |                          |
| $E_{latt}$ (298.15K), kJ·mol <sup>-1</sup>                               | 138.2        |                          | 118.9        |                          |
| $\Delta pV$ , kJ·mol <sup>-1</sup>                                       | 2.4          |                          | 2.5          |                          |
| $\Delta_{cr}^g H_m^0$ (298.15K) - $E_{latt}$ (0 K), kJ·mol <sup>-1</sup> | 1.0          |                          | -0.5         |                          |
| $\Delta_{cr}^g H_m^0$ (298.15K), kJ·mol <sup>-1</sup>                    | 140.7        | 146.5±0.7                | 121.4        | 127.9±1.1                |
| <sup>e</sup> $E_{latt}$ (298.15K) (2RT scheme), kJ·mol <sup>-1</sup>     | 144.6        |                          | 126.4        |                          |
| $S^{cr}$ (298.15K), J·mol <sup>-1</sup> ·K <sup>-1</sup>                 | 265.4        |                          | 252.5        |                          |
| $S^g$ (298.15K), J·mol <sup>-1</sup> ·K <sup>-1</sup>                    | 515.4        |                          | 477.5        |                          |
| $\Delta_{cr}^g S_m^0$ (298.15K), J·mol <sup>-1</sup> ·K <sup>-1</sup>    | 250.0        | 205.5±2.8                | 225.0        | 180.6±4.6                |
| $298.15 \cdot \Delta_{cr}^g S_m^0$ (298.15K), kJ·mol <sup>-1</sup>       | 74.5         | 61.3                     | 67.1         | 53.9                     |
| $\Delta_{cr}^g G_m^0$ (298.15K), kJ·mol <sup>-1</sup>                    | 66.1         | 85.2                     | 53.7         | 74.1                     |

<sup>a</sup> Data taken from Table 4.

<sup>b</sup>  $E_{latt}$ (0 K) was calculated using equation (7) using the interaction energies obtained from QTAIMC data according to equation (6)

<sup>c</sup>  $C_p$  (298.15K) was calculated according to Chickos' additive scheme [3]

<sup>d</sup>  $C_p$  (298.15K) was calculated from the Chickos's correlation equation [4]

<sup>e</sup> Calculated according to equation (8)

**Table S4.** Compounds structurally similar to NFT and FZL, selected from the literature

| N | Compound                               | CAS number | $\Delta_{cr}^g G_m^0(298.15)$<br>kJ·mol <sup>-1</sup> | $\Delta_{cr}^g H_m^0(298.15)$<br>kJ·mol <sup>-1</sup> | $T_{fus}$ ,<br>K | Ref. |
|---|----------------------------------------|------------|-------------------------------------------------------|-------------------------------------------------------|------------------|------|
| 1 | 2-imadazolidinone                      | 120-93-4   | 42.6                                                  | $83.7 \pm 0.8$                                        | 397.35           | [5]  |
| 2 | Succinimide                            | 123-56-8   | 36.7                                                  | $83.6 \pm 1.5$                                        | 400.05           | [6]  |
| 3 | 2,4-Imidazolidinedione                 | 461-72-3   | 57.8                                                  | $116.3 \pm 1.5$                                       | 495.75           | [7]  |
| 4 | 2-Thiohydantoin                        | 503-87-7   | 60.2                                                  | $119.1 \pm 0.5$                                       | 506.05           | [7]  |
| 5 | 5-(4-nitrophenyl)-furan-2-carbaldehyde | 7147-77-5  | 65.4                                                  | $135.9 \pm 2.4$                                       | 479.75           | [8]  |



**Table S5.** Metric and electron-density features of hydrogen bonds formed by water molecules in the [NFT+H<sub>2</sub>O] (1:1) crystal and in the hypothetical [FZL+H<sub>2</sub>O] (1:1) crystal

| Interaction                       | D...A, Å  <br>H...A, Å | ∠D-H...A,<br>° | ρ <sub>b</sub> ,<br>a.u. | ∇ <sup>2</sup> ρ <sub>b</sub> ,<br>a.u. | G <sub>b</sub> ,<br>a.u. | E <sub>int</sub> ,<br>kJ·mol <sup>-1</sup> |
|-----------------------------------|------------------------|----------------|--------------------------|-----------------------------------------|--------------------------|--------------------------------------------|
| <b>[NFT+H<sub>2</sub>O] (1:1)</b> |                        |                |                          |                                         |                          |                                            |
| N13-H13...O18                     | 2.763   1.782          | 165.68         | 0.042                    | 0.130                                   | 0.032                    | <b>36.3</b>                                |
| O18-H181...O16                    | 2.961   2.015          | 157.45         | 0.024                    | 0.070                                   | 0.018                    | <b>20.1</b>                                |
| C15-H151...O18                    | 3.725   2.730          | 172.40         | 0.015                    | 0.039                                   | 0.010                    | <b>11.7</b>                                |
| O18-H182...O8                     | 3.172   2.392          | 134.54         | 0.012                    | 0.038                                   | 0.009                    | <b>10.4</b>                                |
| O18-H182...O1                     | 3.148   2.245          | 150.02         | 0.010                    | 0.038                                   | 0.009                    | <b>9.9</b>                                 |
| O18-H181...N10                    | 3.211   2.499          | 126.07         | 0.010                    | 0.036                                   | 0.008                    | <b>8.9</b>                                 |
| <i>Total energy</i>               |                        |                |                          |                                         |                          | <b>97.2</b>                                |
| <b>[FZL+H<sub>2</sub>O] (1:1)</b> |                        |                |                          |                                         |                          |                                            |
| O18-H181...O16                    | 2.859   1.966          | 151.15         | 0.024                    | 0.073                                   | 0.018                    | <b>20.7</b>                                |
| C15-H151...O18                    | 3.371   2.285          | 170.77         | 0.016                    | 0.037                                   | 0.010                    | <b>11.3</b>                                |
| O18-H182...O1                     | 3.125   2.336          | 138.12         | 0.010                    | 0.039                                   | 0.009                    | <b>10.1</b>                                |
| O18-H181...N10                    | 3.192   2.473          | 130.32         | 0.011                    | 0.036                                   | 0.008                    | <b>9.0</b>                                 |
| <i>Total energy</i>               |                        |                |                          |                                         |                          | <b>51.1</b>                                |

## References:

1. Domańska, U.; Pobudkowska, A.; Pelczarska, A.; Żukowski, Ł. Modelling, solubility and pKa of five sparingly soluble drugs. *Int. J. Pharm.* **2011**, *403*, 115–122, doi:<https://doi.org/10.1016/j.ijpharm.2010.10.034>.
2. Blokhina, S.; Sharapova, A.; Ol'khovich, M.; Perlovich, G. A thermodynamic study of sublimation, dissolution and distribution processes of anti-inflammatory drug Clonixin. *J. Chem. Thermodyn.* **2019**, *132*, 281–288, doi:<https://doi.org/10.1016/j.jct.2019.01.006>.
3. Chickos, J.S.; Acree, W.E. Enthalpies of Sublimation of Organic and Organometallic Compounds. 1910–2001. *J. Phys. Chem. Ref. Data* **2002**, *31*, 537–698, doi:10.1063/1.1475333.
4. Chickos, J.S.; Hosseini, S.; Hesse, D.G.; Liebman, J.F. Heat capacity corrections to a standard state: a comparison of new and some literature methods for organic liquids and solids. *Struct. Chem.* **1993**, *4*, 271–278, doi:10.1007/BF00673701.
5. Ribeiro da Silva, M. das D.M.C.; Ribeiro da Silva, M.A. V; Freitas, V.L.S.; Roux, M.V.; Jiménez, P.; Temprado, M.; Dávalos, J.Z.; Cabildo, P.; Claramunt, R.M.; Elguero, J. Structural studies of cyclic ureas: 1. Enthalpies of formation of imidazolidin-2-one and N,N'-trimethyleneurea. *J. Chem. Thermodyn.* **2008**, *40*, 386–393, doi:<https://doi.org/10.1016/j.jct.2007.08.004>.
6. Meng-Yan, Y.; Pilcher, G. Enthalpies of combustion of succinic anhydride, glutaric anhydride, and glutarimide. *J. Chem. Thermodyn.* **1990**, *22*, 893–898, doi:[https://doi.org/10.1016/0021-9614\(90\)90177-R](https://doi.org/10.1016/0021-9614(90)90177-R).
7. Silva, A.L.R.; Cimas, Á.; Vale, N.; Gomes, P.; Monte, M.J.S.; Ribeiro da Silva, M.D.M.C. Experimental and computational study of the energetics of hydantoin and 2-thiohydantoin. *J. Chem. Thermodyn.* **2013**, *58*, 158–165, doi:<https://doi.org/10.1016/j.jct.2012.10.010>.
8. Dibrivnyi, V.; Sobechko, I.; Puniak, M.; Horak, Y.; Obushak, M.; Van-Chin-Syan, Y.; Andriy, M.; Velychkivska, N. Thermodynamic properties of 5(nitrophenyl) furan-2-carbaldehyde isomers. *Chem. Cent. J.* **2015**, *9*, 67, doi:10.1186/s13065-015-0144-x.
